# Supplementary material for: Improvement of the hepatic lipid status in intrauterine growth retarded pigs by resveratrol is related to the inhibition of mitochondrial dysfunction, oxidative stress and inflammation
Source: Royal Society of Chemistry journal article supplement (doi:10.1039/d0fo01459a), 2020-12-11
Supplement: d0fo01459a1.pdf [file d0fo01459a1.pdf]

Supplementary Table 1

Composition and nutrient levels of the diets for sows (% , as-fed basis unless otherwise stated)

| Ingredients         | Content | Calculated nutrient levels | Content |
|---------------------|---------|----------------------------|---------|
| Corn                | 54.00   | Metabolic energy (MJ/kg)   | 13.40   |
| Soybean meal        | 18.00   | Net energy (MJ/kg)         | 10.13   |
| Wheat bran          | 10.00   | Crude protein              | 16.50   |
| Wheat middling      | 10.00   | Crude fiber                | 3.40    |
| Fish meal           | 1.50    | Ca                         | 0.85    |
| Soybean oil         | 2.50    | TP                         | 0.60    |
| Premix <sup>1</sup> | 4.00    | Lys                        | 1.05    |
| Total               | 100.00  | Thr                        | 0.65    |

<sup>1</sup>Provide per kg of diet: vitamin A, 8000 IU; vitamin D3, 2000 IU; vitamin E, 40 mg; vitamin K, 2 mg; vitamin B1, 3 mg; vitamin B2, 5 mg; vitamin B6, 3 mg; vitamin B12, 0.04 mg; nicotinic acid, 30 mg; pantothenic acid, 20 mg; folic acid, 1.5 mg; biotin, 0.3 mg; Fe, 100 mg; Cu, 20 mg; Zn, 80 mg; Mn, 40 mg; I, 0.3 mg; Se, 0.25 mg.
