# Supplementary material for: Improvement of the hepatic lipid status in intrauterine growth retarded pigs by resveratrol is related to the inhibition of mitochondrial dysfunction, oxidative stress and inflammation
Source: Royal Society of Chemistry journal article supplement (doi:10.1039/d0fo01459a), 2020-12-11
Supplement: d0fo01459a2.pdf [file d0fo01459a2.pdf]

Supplementary Table 2

Composition and nutrient levels of the diets for experimental pigs (% , as-fed basis unless otherwise stated)

| Items                       | 5-10 kg | 11-30 kg | 30-100 kg |
|-----------------------------|---------|----------|-----------|
| Ingredients                 |         |          |           |
| Corn                        | 53.40   | 60.22    | 60.10     |
| Full-fat rice bran          | 0.00    | 7.50     | 8.00      |
| Flour                       | 15.00   | 0.00     | 0.00      |
| Wheat middlings             | 0.00    | 10.00    | 10.00     |
| Bran                        | 0.00    | 2.00     | 6.00      |
| Soybean meal                | 17.50   | 16.50    | 0.00      |
| Fermented soybean meal      | 2.50    | 0.00     | 0.00      |
| De-hulled soybean meal      | 0.00    | 0.00     | 13.10     |
| Soybean oil                 | 2.30    | 0.00     | 0.00      |
| Fish meal                   | 1.25    | 0.00     | 0.00      |
| Soybean protein concentrate | 2.50    | 0.00     | 0.00      |
| Glucose                     | 1.25    | 0.00     | 0.00      |
| Phospholipid powder         | 1.00    | 0.00     | 0.00      |
| Limestone                   | 0.91    | 1.40     | 1.00      |
| CaHPO <sub>4</sub>          | 0.46    | 0.49     | 0.00      |
| Salt                        | 0.41    | 0.35     | 0.38      |
| Lys                         | 0.42    | 0.43     | 0.35      |
| Met                         | 0.10    | 0.11     | 0.07      |
| Premix <sup>1, 2, 3</sup>   | 1.00    | 1.00     | 1.00      |
| Total                       | 100.00  | 100.00   | 100.00    |
| Calculated nutrient level   |         |          |           |
| Digestible energy (MJ/kg)   | 14.42   | 12.60    | 12.43     |
| Crude protein               | 18.30   | 15.60    | 14.6      |
| Ether extract               | 3.00    | 3.82     | 4.15      |
| Crude fiber                 | 6.00    |          |           |
| Lys                         | 1.24    | 0.98     | 0.91      |
| Ca                          | 0.78    | 0.70     | 0.59      |
| P                           | 0.38    | 0.57     | 0.51      |

<sup>1</sup> Provided per kg of diet: Vitamin A, 15,000 IU; Vitamin B1, 3 mg; Vitamin B2, 6 mg; Vitamin B6, 7 mg; Vitamin B12, 0.03 mg; Vitamin D3, 3200 IU; Vitamin E, 22 mg; Vitamin K3, 3 mg; Niacin, 30 mg; Pantothenic acid, 15.0mg; Folic acid, 1.20 mg; Biotin, 0.08 mg; Choline chloride, 500 mg; Fe, 120 mg; Cu, 120 mg; Zn, 110 mg; Mn, 43 mg; I, 0.70 mg; Se, 0.30 mg.

<sup>2</sup> Provided per kg of diet: Vitamin A, 6400 IU; Vitamin B1, 1.2 mg; Vitamin B2, 4.0mg; Vitamin B6, 3.0 mg; Vitamin B12, 0.04 mg; Vitamin D3, 3200 IU; Vitamin E, 16 mg; Vitamin K3, 2.0mg; Niacin, 30 mg; Pantothenic acid, 15.0mg; Folic acid, 0.6 mg; Biotin, 0.05 mg; Choline chloride, 400 mg; Fe, 100 mg; Cu, 18 mg; Zn, 80 mg; Mn, 27 mg; I, 0.75mg; Se, 0.3mg.

<sup>3</sup> Provided per kg of diet: Vitamin A, 6500 IU; Vitamin B1, 2.0mg; Vitamin B2, 4.0mg; Vitamin B6, 2.0mg; Vitamin B12, 0.04mg; Vitamin D3, 2200 IU; Vitamin E, 25mg; Vitamin K3, 2.0mg; Niacin, 30 mg; Pantothenic acid, 15.0mg; Folic acid, 0.6 mg; Biotin, 0.05 mg; Choline chloride, 300 mg; Fe, 60 mg; Cu, 21.0mg; Zn, 60 mg; Mn, 15.0mg; I, 0.75mg; Se, 0.3mg; Ca, 5.1 g; P, 0.6g.
