# Supplementary material for: Improvement of the hepatic lipid status in intrauterine growth retarded pigs by resveratrol is related to the inhibition of mitochondrial dysfunction, oxidative stress and inflammation
Source: Royal Society of Chemistry journal article supplement (doi:10.1039/d0fo01459a), 2020-12-11
Supplement: d0fo01459a3.pdf [file d0fo01459a3.pdf]

Supplementary Table 3

Sequences for real-time PCR primers

| Gene          | GenBank ID     | Sequence (5' → 3', Forward primer/Reverse primer) | Product length (bp) |
|---------------|----------------|---------------------------------------------------|---------------------|
| Nrf2          | XM_013984303.2 | ATCCAGCGGATTGCTCGTAG<br>TCAAATCCATGTCCTTGGCG      | 155                 |
| Keap1         | NM_001114671.1 | TCTGCTTAGTCATGGTGACCT<br>GGGGTTCCAGATGACAAGGG     | 158                 |
| HO-1          | NM_001004027.1 | TGATGGCGTCCTTGTACCAC<br>GACCGGGTTCTCCTTGTTGT      | 71                  |
| SOD1          | NM_001190422.1 | CATTCATCATTGGCCGCAC<br>TTACACCACAGGCCAAACGA       | 118                 |
| SOD2          | NM_214127.2    | CAAGAAGGGGCACCACGTT<br>CTCAGGGGACGCAAGAACTG       | 70                  |
| GCLC          | XM_003482164.4 | CTAGTGGGTAGGCGGACTGG<br>CGGTGTCGTGCTCTAGCTTC      | 81                  |
| GCLM          | XM_001926378.4 | GGACAAAACCCAGTTGGAGC<br>TCACACAGCAAGAGGCAAGA      | 86                  |
| GPX1          | NM_214201.1    | CCTCAAGTACGTCCGACCAG<br>GTGAGCATTGCGCCATTCA       | 85                  |
| GPX4          | NM_214407.1    | TGTGTGAATGGGGACGATGC<br>CTTCACCACACAGCCGTTCT      | 135                 |
| GR            | AY368271.1     | GTGAGCCGACTGAACACCAT<br>CAGGATGTGAGGAGCTGTGT      | 141                 |
| SREBP1c       | NM_214157.1    | GCGACGGTGCCTCTGGTAGT<br>CGCAAGACGGCGGATTTA        | 218                 |
| PPAR $\alpha$ | NM_001044526.1 | GGCACTGAACATCGAATGTAGAAT<br>TGCAACCTTCACAGGCATGA  | 80                  |
| ACC           | NM_001114269.1 | ATCCCTCCTGCCTCTCCTA<br>ACTTCCCGTTCAGATTCCG        | 208                 |
| SCD1          | NM_213781.1    | ATTGGGAGCTGTGGGTGAG<br>AAGTTGATGTGCCAGCGGTA       | 90                  |
| FAS           | NM_001099930.1 | TACCTTGTGGATCACTGCATAGA<br>GGCGTCTCCTCCAAGTTCTG   | 113                 |
| MTTP          | NM_214185.1    | AGCAAAATGGTCCGTCGAGT<br>CGAATGGGGACCACGTTCTA      | 114                 |
| CD36          | NM_001044622.1 | TGACCCAGCACTTGAAGCAA<br>AAGATATCAGTTAGGAGTCCGATGA | 130                 |
| FATP1         | NM_001083931.1 | AGGTCTGGCGTGGGTCAAAG<br>GGAGTAGAGGGCAAAGCAGG      | 208                 |
| L-FABP1       | NM_001004046.2 | AGGGGACATCGGAAATCGTG<br>TCACACTCCTCTCCAAGGT       | 103                 |
| LPL           | NM_214286.1    | CACATTCACCAGAGGGTC<br>TCATGGGAGCACTTCACG          | 177                 |

|                |                |                                                   |     |
|----------------|----------------|---------------------------------------------------|-----|
| HSL            | NM_214315.3    | GCAGCATCTTCTCCGCACA<br>AGCCCTTGCGTAGAGTGACA       | 195 |
| CPT1 $\alpha$  | NM_001129805.1 | TCAAAAACGGCAAGATGGGC<br>TGGAATGTTGGGGTTGGTGT      | 155 |
| SIRT1          | NM_001145750.2 | TTGCAACAGCATCTTGCCTG<br>GGACATCGAGGAACCACCTG      | 91  |
| PGC-1 $\alpha$ | NM_213963.2    | GCTTGACGAGCGTCATTAG<br>GGTCTTCACCAACCAGAGCA       | 100 |
| NRF1           | XM_021078993.1 | GAAGCTGTCCAGGGGCTTTA<br>ATCCATGCTCTGCTACTGGG      | 116 |
| ERR $\alpha$   | NM_001170521.1 | ACGAGTGCAGATCACCAAG<br>TTGTACTTCTGTCGCCACC        | 130 |
| TFAM           | NM_001130211.1 | AGCGAGGTCTGAAGAGTTGC<br>TTGCACCCGTAGACAAAGCA      | 114 |
| POLG           | XM_001927064.5 | CTGTCAGATGAGGGCGAGTG<br>ACTTCTCCGTCGTGACTTTCT     | 133 |
| NDUFA1         | XM_003135339.5 | GCTTCCGGGAAGGAATCAA<br>CCGGGGAGAATTCGAACCA        | 101 |
| NDUFA4         | NM_001097468.2 | AACCCTGGAATAAACTGGGTCC<br>TGCGGATGGCTTCTGGAAAA    | 152 |
| NDUFA6         | NM_001185178.1 | TCTCAGAGCCTTGCATGTCG<br>AAGCCATCCAGCATCGTACC      | 85  |
| NDUFA13        | NM_001244646.1 | ATGAAGGATGTGCCGACTG<br>CCATAGGTGGCGCTGAGAAAT      | 125 |
| NDUFB1         | XM_003482306.4 | TGCCTCCGGAACAAGAGTC<br>GCAATTCAGCCACAGCCTTT       | 88  |
| SDHA           | XM_021076930.1 | CAATAAGAGGTCGTCCGCCA<br>AGAGAGACCAAACGCAGCTC      | 127 |
| SDHB           | NM_001104953.1 | TCCTATGGTGTGGATGCGT<br>AGTGTGCCTCCGTTGATGT        | 124 |
| UQCRB          | NM001185172.1  | CATCAGGCAACGTTCTGTGTC<br>TATACCCTCCAGCCACTTGC     | 81  |
| CytC           | NM_001129970.1 | CTGGGGAGAGGAGACTGAT<br>AGGCGGTGGCCAACTTTTAC       | 158 |
| COX IV         | XM_021093705.1 | CCAAGTGGGACTACGACAAGAAC<br>CCTGCTCGTTTATTAGCACTGG | 131 |
| COX V          | NM_001007517.1 | ATCTGGAGGTGGTGTTCCTACTG<br>GTTGGTGATGGAGGGGACTAAA | 160 |
| ATP5A1         | NM_001185142.1 | ACGCCATTGATGGAAAGGGT<br>TGGTCCCGCACAGAGATTC       | 98  |
| ATP5B1         | XM_001929410.5 | CATGTTGGGCTTTGTGGGTC<br>ATAGTCTCTGGCAGGCTGGA      | 139 |
| ATP5G1         | NM_001025218.2 | GTGAGTCAGTCACCTTGAGC<br>GAGAAATGAGTAGCGCCCCG      | 110 |

|                                       |                |                                                  |     |
|---------------------------------------|----------------|--------------------------------------------------|-----|
| MCP1                                  | NM_214214.1    | AAACGGAGACTTGGGCACAT<br>GCAAGGACCCTTCCGTCATC     | 74  |
| F4/80                                 | XM_021083974.1 | TCCTTCTCTTTTGGGGGTGT<br>GCCATTGACTCCAACGGAGA     | 73  |
| CD11c                                 | XR_002342355.1 | GGAGCAAATGGACAGACCGT<br>GAATGCAGGTGCAAAGGCAA     | 95  |
| TLR4                                  | GQ304754       | TTTCTTGCAGTGGGTCGAGG<br>GGAAGGTGAGAACTGACGCA     | 161 |
| MyD88                                 | NM001099923.1  | GTGCCGTCGGATGGTAGTG<br>TCTGGAAGTCACATTCCCTTGCTT  | 65  |
| TRAF6                                 | NM_001105286.1 | GCTGCATCTATGGCATTGAAG<br>CCACAGATAACATTTGCCAAAGG | 71  |
| NF-KB, p65                            | NM_001114281.1 | GGGGCGATGAGATCTTCCTG<br>CACGTCGGCTTGTGAAAAGG     | 110 |
| TNF- $\alpha$                         | NM_214022.1    | GCCCTTCCACCAACGTTTTTC<br>CAAGGGCTCTTGATGGCAGA    | 97  |
| IL6                                   | NM_214399.1    | ACAAAGCCACCACCCTAAC<br>CGTGGACGGCATCAATCTCA      | 185 |
| IL1 $\beta$                           | NM_214055.1    | ATTCAGGGACCCTACCCTCTC<br>ATCACTTCCTTGGCGGGTTC    | 92  |
| IL10                                  | NM_214041.1    | CGGCCAGTGAAGAGTTTCT<br>GGCAACCCAGGTAACCCTTA      | 98  |
| $\beta$ -actin                        | XM_003124280.5 | CTCCAGAGCGCAAGTACTCC<br>AATGCAACTAACAGTCCGCC     | 153 |
| mt D-loop<br>(mtDNA<br>analysis)      | AF276923.1     | GCCTTGCCAAACCCCAAAAA<br>TAGGTGCCTGCTTTCGTAGC     | 137 |
| $\beta$ -actin<br>(mtDNA<br>analysis) | DQ452569.1     | GAAGCTCAGTCGGGCTTCTC<br>ATGTCGACGTCGCACTTCAT     | 95  |

Nrf2, nuclear factor erythroid-derived 2-like 2; Keap1, Kelch-like ECH-associated protein 1; HO1, heme oxygenase 1 ; SOD1, superoxide dismutase 1 ; SOD2, superoxide dismutase 2; GCLC, glutamate-cysteine ligase catalytic subunit; GCLM, glutamate-cysteine ligase modifier subunit; GPX1, glutathione peroxidase 1; GPX4, glutathione peroxidase 4; GR, glutathione reductase ; SREBP1c, sterol regulatory element binding protein 1c; PPAR $\alpha$ , peroxisome proliferator activated receptor alpha; ACC, acetyl-CoA carboxylase; SCD1, stearoyl-CoA desaturase 1; FAS, fatty acid synthase; MTTP, microsomal triglyceride transfer protein; CD36, cluster of differentiation 36; FATP1, fatty acid transport proteins 1; L-FABP1, liver fatty acid binding proteins 1; LPL, lipoprotein lipase; HSL, hormone-sensitive lipase; CPT1 $\alpha$ , carnitine palmitoyltransferase 1 alpha; SIRT1, sirtuin 1; PGC-1 $\alpha$ , peroxisome proliferation activated receptor gamma coactivator-1 alpha; NRF1, nuclear respiratory factor 1; ERR $\alpha$ , estrogen-related receptor alpha; TFAM, mitochondrial transcription factor A; POLG, polymerase gamma; NDUFA1, NADH dehydrogenase (ubiquinone) 1 alpha subcomplex 1; NDUFA4, NADH dehydrogenase (ubiquinone) 1 alpha subcomplex 4; NDUFA6, NADH dehydrogenase (ubiquinone) 1 alpha subcomplex 6; NDUFA13, NADH dehydrogenase (ubiquinone) 1 alpha subcomplex 13; NDUFB1, NADH dehydrogenase (ubiquinone) 1 beta subcomplex 1; SDHA, succinate dehydrogenase complex flavoprotein subunit A; SDHB, succinate dehydrogenase

complex iron sulfur subunit B; UQCRB, ubiquinol-cytochrome c reductase binding protein; CytC, cytochrome c; COX IV, cytochrome c oxidase IV; COX V, cytochrome c oxidase V; ATP5A1, ATP synthase alpha subunit; ATP5B, ATP synthase beta polypeptide; ATP5G1, ATP synthase F0 complex subunit C1; MCP1, monocyte chemotactic protein 1; F4/80, adhesion G protein-coupled receptor E1; CD11c, integrin alpha X; TLR4, toll-like receptor 4; MyD88, myeloid differentiation factor 88; TRAF6, tumor necrosis factor receptor-associated factor 6; NF- $\kappa$ B, nuclear factor- $\kappa$ B; TNF- $\alpha$ , tumor necrosis factor alpha; IL-6, interleukin 6; IL1 $\beta$ , interleukin 1 $\beta$ ; IL10, interleukin 10; mt D-loop, mitochondrial D-loop;  $\beta$ -actin, beta actin.
